# Supplementary material for: Salient brain entities labelled in P2rx7-EGFP reporter mouse embryos include the septum, roof plate glial specializations and circumventricular ependymal organs
Source: Springer Nature journal article supplement (doi:10.1007/s00429-020-02204-5), 2021-01-11

a

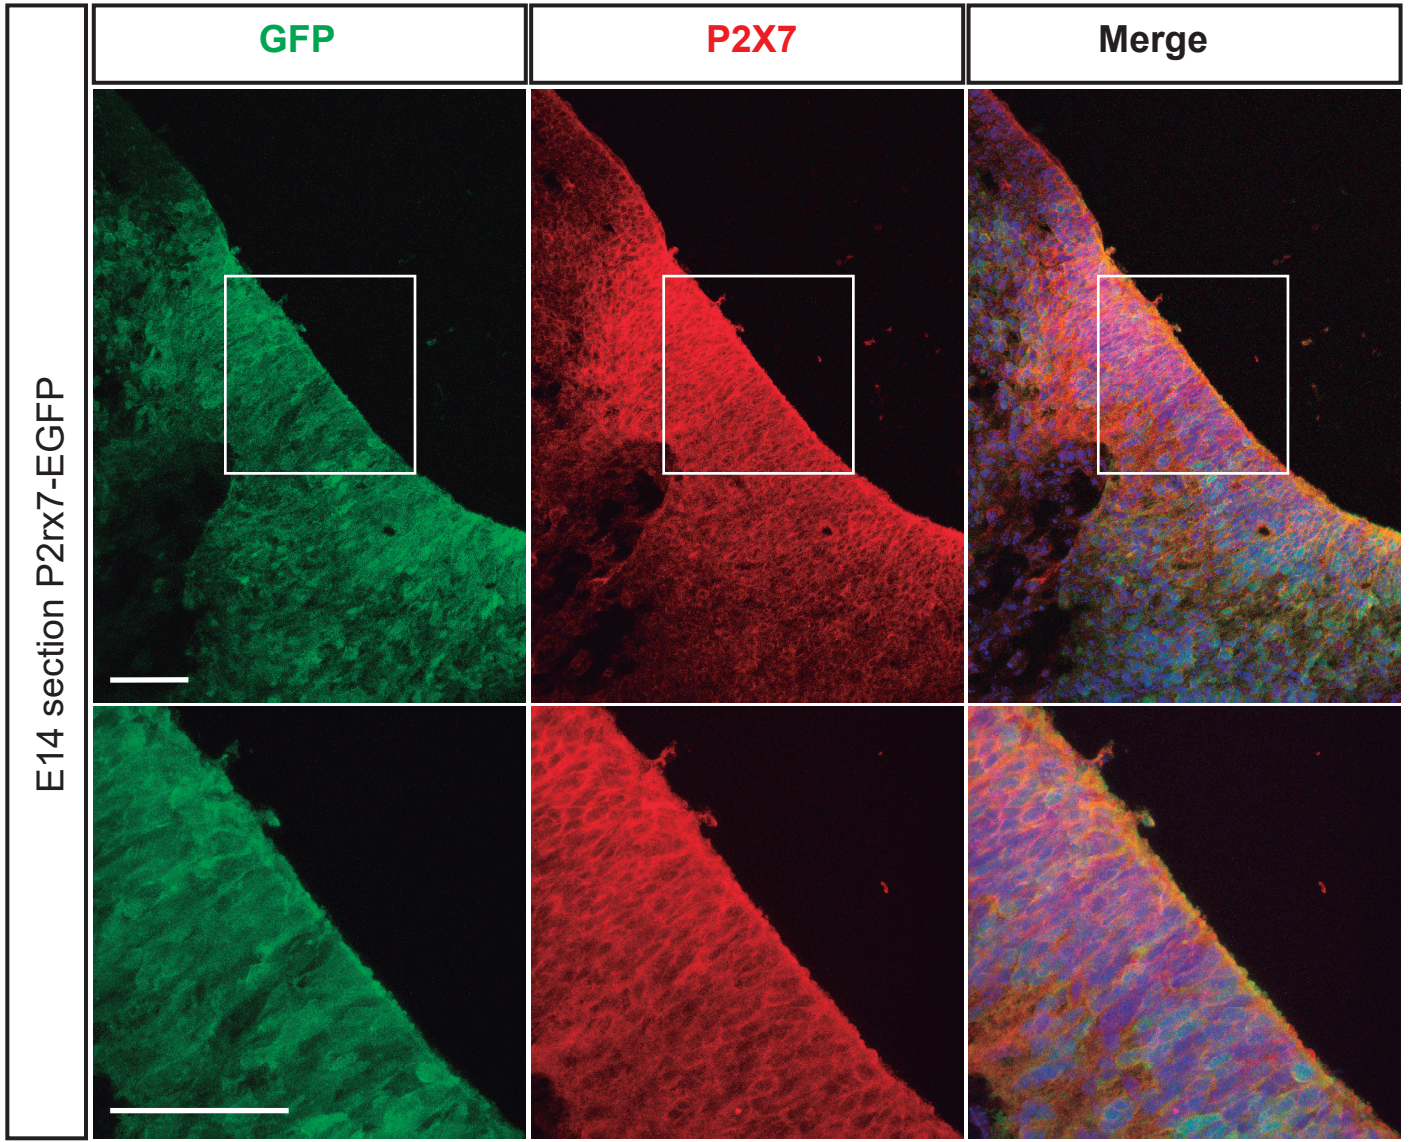

b

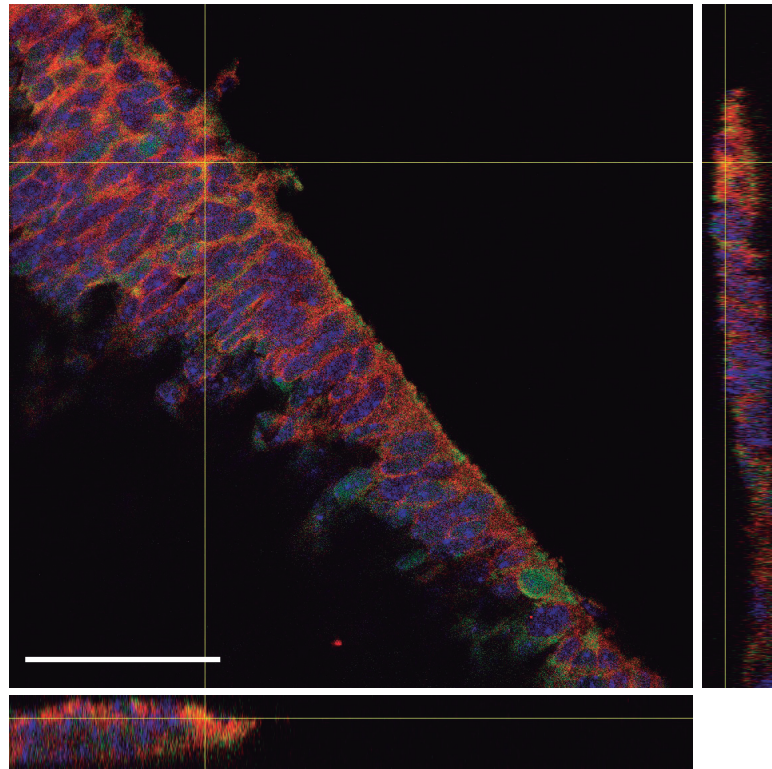

Supplement: MOESM1 [file 18757726]
